# Supplementary material
Source: publisher figshare collection journal article supplement (https://karger.figshare.com/articles/dataset/_/24924279)
Supplement: Supplementary file 2 [file 1]

## Oldenburg Burnout Inventory

Instructions: The following statements refer to your feelings and attitudes during work. Please indicate to what extent you agree with each of the following statements by selecting the number that corresponds with the statement.

|                                                                                                                                                     | Strongly<br>Agree                                                                       | Agree | Disagree | Strongly<br>Disagree |
|-----------------------------------------------------------------------------------------------------------------------------------------------------|-----------------------------------------------------------------------------------------|-------|----------|----------------------|
|                                                                                                                                                     | 1                                                                                       | 2     | 3        | 4                    |
| 1. Bei meiner Arbeit entdecke ich immer wieder neue, interessante Aspekte. ( <i>Disengagement</i> )                                                 | I always find new and interesting aspects in my work                                    |       |          |                      |
| 2. Es gibt Tagen, daß ich mich schon vor der Arbeit müde fühle. ( <i>Exhaustion</i> ) R                                                             | There are days when I feel tired before I arrive at work                                |       |          |                      |
| 3. Es passiert mir immer öfter, daß ich mich abwertend über meine Arbeitstätigkeit äußere. ( <i>Disengagement</i> ) R                               | It happens more and more often that I talk about my work in a negative way              |       |          |                      |
| 4. Nach der Arbeit brauche ich jetzt oft längere Erholungszeiten als früher, um wieder fit zu werden. ( <i>Exhaustion</i> ) R                       | After work, I tend to need more time than in the past in order to relax and feel better |       |          |                      |
| 5. Die Belastung durch meine Arbeit ist ganz gut zu ertragen. ( <i>Exhaustion</i> )                                                                 | I can tolerate the pressure of my work very well                                        |       |          |                      |
| 6. Ich neige in letzter Zeit vermehrt dazu, bei meiner Arbeit wenig zu denken, sondern sie fast mechanisch zu erledigen. ( <i>Disengagement</i> ) R | Lately, I tend to think less at work and do my job almost mechanically                  |       |          |                      |
| 7. Meine Arbeit stellt viele Herausforderungen an mich. ( <i>Disengagement</i> )                                                                    | I find my work to be a positive challenge                                               |       |          |                      |
| 8. Ich habe bei der Arbeit immer häufiger das Gefühl, emotional ausgelaugt zu sein. ( <i>Exhaustion</i> ) R                                         | During my work, I often feel emotionally drained                                        |       |          |                      |
| 9. Mit der Zeit verliert man die innere Beziehung zur eigenen Arbeit. ( <i>Disengagement</i> ) R                                                    | Over time, one can become disconnected from this type of work                           |       |          |                      |
| 10. Nach der Arbeit bin ich in der Regel noch ganz fit für meine Freizeitaktivitäten. ( <i>Exhaustion</i> )                                         | After working, I have enough energy for my leisure activities                           |       |          |                      |
| 11. Manchmal bin ich von meiner Arbeitstätigkeit richtiggehend angewidert. ( <i>Disengagement</i> ) R                                               | Sometimes I feel sickened by my work tasks                                              |       |          |                      |
| 12. Nach der Arbeit fühle ich mich in der Regel schlapp und abgespannt. ( <i>Exhaustion</i> ) R                                                     | After my work, I usually feel worn out and weary                                        |       |          |                      |

- |                                                                                                   |                                                                |
|---------------------------------------------------------------------------------------------------|----------------------------------------------------------------|
| <b>13.</b> Ich kann mir für mich keinen anderen Beruf vorstellen. ( <i>Disengagement</i> )        | This is the only type of work that I can imagine myself doing. |
| <b>14.</b> In der Regel kann ich meine Arbeitsmenge gut schaffen. ( <i>Exhaustion</i> )           | Usually, I can manage the amount of my work well               |
| <b>15.</b> Mit der Zeit engagiere ich mich immer mehr bei meiner Arbeit. ( <i>Disengagement</i> ) | I feel more and more engaged in my work                        |
| <b>16.</b> Während meiner Arbeit fühle ich mich total belebt. ( <i>Exhaustion</i> )               | When I work, I usually feel energized                          |

### Explanations

1. The OLBI measures the two core dimensions of burnout, namely exhaustion and disengagement. For both dimensions, four items are phrased negatively, and four items are phrased positively.
2. The answer categories in German are 1 = völlig zutreffend (strongly agree) to 4= völlig unzutreffend (strongly disagree).
3. Items marked with an R have to be reversed before the average scores for each sub-scale are calculated. This means the following recoding (1=4, 2=3, 3=2, 4=1). In this way higher scores indicate higher exhaustion and disengagement.

### Please refer to the following source:

Demerouti, E., Bakker, A.B., Vardakou, I., & Kantas, A. (2003). The convergent validity of two burnout instruments: A multitrait-multimethod analysis. *European Journal of Psychological Assessment*, 19, 12-23.

### Remark

The OLBI can be used for free for scientific studies, under the agreement that the authors may use the data for further validation of the instrument. Please send the data, including information on gender, age, education, organizational tenure, and type of occupation, to:

Evangelia Demerouti

Eindhoven University of Technology

Dept. Industrial Engineering & Innovation Sciences

Human Performance Management Group

P.O.Box 513, 5600 MB Eindhoven, The Netherlands

T + 31 40 247 5669 / 2493

[e.demerouti@tue.nl](mailto:e.demerouti@tue.nl)

## Welbevinden

De volgende vragen gaan over de manier waarop u uw werk beleeft en hoe u zich daarbij voelt. Wilt u aangeven in hoeverre elke uitspraak op u van toepassing is door steeds het best passende antwoord te kiezen?

| 1               |                                                                                                           | 2        |   | 3                 |   |
|-----------------|-----------------------------------------------------------------------------------------------------------|----------|---|-------------------|---|
| geheel mee eens |                                                                                                           | mee eens |   | mee oneens        |   |
|                 |                                                                                                           |          |   | 4                 |   |
|                 |                                                                                                           |          |   | geheel mee oneens |   |
| 1               | Er zijn dagen dat ik al moe ben voordat ik naar mijn werk ga.                                             | 1        | 2 | 3                 | 4 |
| 2               | Ik ontdek steeds weer nieuwe en interessante kanten aan mijn werk.                                        | 1        | 2 | 3                 | 4 |
| 3               | De werkbelasting is heel goed te verdragen.                                                               | 1        | 2 | 3                 | 4 |
| 4               | Het gebeurt steeds vaker dat ik me afstandelijk over mijn werk uitlaat.                                   | 1        | 2 | 3                 | 4 |
| 5               | Na mijn werk heb ik nu vaak meer tijd nodig om te ontspannen dan voorheen om weer fit te worden.          | 1        | 2 | 3                 | 4 |
| 6               | Ik ben steeds meer geneigd om mijn werk bijna "mechanisch" uit te voeren, zonder al te veel na te denken. | 1        | 2 | 3                 | 4 |
| 7               | Tijdens mijn werk voel ik me steeds vaker emotioneel uitgeput.                                            | 1        | 2 | 3                 | 4 |
| 8               | Ik ervaar mijn werk als een echte uitdaging.                                                              | 1        | 2 | 3                 | 4 |
| 9               | Na mijn werk voel ik me meestal nog heel fit voor mijn vrijetijdsbesteding.                               | 1        | 2 | 3                 | 4 |
| 10              | Na verloop van tijd heb ik de persoonlijke band met mijn werk verloren.                                   | 1        | 2 | 3                 | 4 |
| 11              | Normaalgesproken kan ik de hoeveelheid werk goed aan.                                                     | 1        | 2 | 3                 | 4 |
| 12              | Ik heb het soms helemaal gehad met mijn werkzaamheden.                                                    | 1        | 2 | 3                 | 4 |
| 13              | Na mijn werk voel ik me meestal slap en fysiek vermoeit.                                                  | 1        | 2 | 3                 | 4 |
| 14              | Ik kan me geen ander beroep voorstellen.                                                                  | 1        | 2 | 3                 | 4 |
| 15              | Als ik werk voel ik me meestal fit.                                                                       | 1        | 2 | 3                 | 4 |
| 16              | Ik raak meer en meer betrokken bij mijn werk.                                                             | 1        | 2 | 3                 | 4 |
