# Supplementary material
Source: publisher figshare collection journal article supplement (https://karger.figshare.com/articles/dataset/_/24924279)
Supplement: Supplementary file 3 [file 1]

### Supplement 3: Physicians' characteristics

|                                        |                                         | N (%)     | Median (Range) |
|----------------------------------------|-----------------------------------------|-----------|----------------|
| <b>All physicians</b>                  |                                         | 126 (100) |                |
| <b>Gender</b>                          | male                                    | 52 (41)   | 52 (26-68)     |
|                                        | female                                  | 73 (58)   |                |
|                                        | diverse                                 | 1 (1)     |                |
| <b>Age</b>                             |                                         |           | 52 (26-68)     |
| <b>Medical specialty status</b>        | in training                             | 11 (9)    | 10 (0.1-32)    |
|                                        | completed                               | 115 (91)  |                |
| <b>Medical specialty</b>               | Anaesthesiology                         | 42 (33)   |                |
|                                        | Internal Medicine                       | 40 (32)   |                |
|                                        | Internal Medicine + Hematology/Oncology | 29 (23)   |                |
|                                        | General Medicine                        | 6 (5)     | 10 (0.1-32)    |
|                                        | Others                                  | 9 (7)     |                |
| <b>Years of work (palliative care)</b> |                                         |           |                |
| <b>Palliative care</b>                 | in training                             | 10 (8)    |                |
|                                        | completed                               | 114 (90)  | 45 (20-72)     |
|                                        | not yet started                         | 2 (2)     |                |
| <b>Professional status</b>             | Fellow                                  | 10 (8)    |                |
|                                        | Board-certified                         | 24 (19)   |                |
|                                        | Senior physician                        | 49 (39)   | 45 (20-72)     |
|                                        | Head physician                          | 43 (34)   |                |
| <b>Employment</b>                      | 1-50%                                   | 9 (7)     |                |
|                                        | 51-75%                                  | 17 (14)   |                |
|                                        | 76-99%                                  | 23 (18)   | 45 (20-72)     |
|                                        | 100%                                    | 77 (61)   |                |
| <b>Weekly hours</b>                    |                                         |           | 45 (20-72)     |
