# Supplementary material
Source: publisher figshare collection journal article supplement (https://karger.figshare.com/articles/dataset/_/24924279)
Supplement: Supplementary file 4 [file 1]

### 1) Zu Ihrer Person

- Wie alt sind Sie? \_\_\_\_\_ (Jahre)
- Geschlecht:
  - ☐ männlich
  - ☐ weiblich
  - ☐ divers
- Familienstand:
  - ☐ ledig
  - ☐ verheiratet/ in Beziehung
  - ☐ geschieden
  - ☐ verwitwet
- Haben Sie Kinder?
  - ☐ Ja
  - ☐ Nein
- Haben Sie Hobbys (auch z.B. Haustiere)? \_\_\_\_\_

### 2) Zu Ihrer Arbeit und Einrichtung

- Wie weit sind Sie in der Facharztausbildung?
  - ☐ Noch in Weiterbildung
  - ☐ Abgeschlossen
- Facharzt für/angestrebter Facharzt: \_\_\_\_\_
- Status der Zusatzbezeichnung Palliativmedizin
  - ☐ Noch in Weiterbildung
  - ☐ Abgeschlossen
  - ☐ Noch nicht angefangen
- Anzahl Arbeitsjahre in der stationären Palliativversorgung \_\_\_\_\_ (Jahre)
- In welcher Funktion sind Sie tätig?
  - ☐ Assistenzarzt
  - ☐ Facharzt
  - ☐ Oberarzt
  - ☐ ltd. OA / Chefarzt
- Wie viele Stunden arbeiten Sie im Schnitt pro Woche? \_\_\_\_\_ (Stunden)
- Zu wieviel % sind Sie angestellt? \_\_\_\_\_ (%)
- In welcher Art Einrichtung sind Sie tätig?
  - ☐ Palliativstation
  - ☐ Palliativeinheit
  - ☐ Palliativbetten
- Wie groß ist die Kapazität Ihrer Einrichtung, gemessen an der Anzahl der Betten? \_\_\_\_\_ (Betten)

- Welches Abrechnungssystem nutzen Sie?

☐ DRG

☐ Pflegegleiche Tagessätze

☐ Sonstiges: \_\_\_\_\_

### **3) Burnout Symptomatik**

- Hatten sie schon einmal Fehlstunden aufgrund von Erschöpfungssymptomen?
- Gibt es in Ihrer Einrichtung regelmäßige Supportivmaßnahmen für die ärztlichen Mitarbeiter?
- Wenn ja, welche?

☐ Ja

☐ Nein

☐ Ja

☐ Nein

☐ Supervisionen

☐ Mitarbeiter-Gespräche

☐ Teambesprechungen

☐ Sonstige: \_\_\_\_\_

- Würden Sie mit Ihrem Wissen und Ihren Erfahrungen von heute nochmal den gleichen beruflichen Weg einschlagen?

☐ Ja

☐ Nein

- Anmerkungen (freiwillig):

---

**Herzlichen Dank für Ihre Antworten!**

### **1) About yourself**

- How old are you? \_\_\_\_\_ (years)
- Gender:
  - ☐ male
  - ☐ female
  - ☐ diverse
- Marital status:
  - ☐ single
  - ☐ married/ in relationship
  - ☐ divorced
  - ☐ widowed
- Do you have children?
  - ☐ yes
  - ☐ no
- Do you have any hobbies (e.g. pets)? \_\_\_\_\_

### **2) About your work and institution**

- Your status of medical specialty training?
  - ☐ still in training
  - ☐ completed
- (intended) Board-certification: \_\_\_\_\_
- Your status of palliative care training?
  - ☐ still in training
  - ☐ completed
  - ☐ not yet started
- Number of years working in inpatient Palliative care \_\_\_\_\_ (years)
- What is your professional status?
  - ☐ Fellow
  - ☐ Board-certified
  - ☐ Senior physician
  - ☐ head physician
- How many hours do you work on average per week? \_\_\_\_\_ (hours)
- What percentage are you employed? \_\_\_\_\_ (%)
- What type of institution do you work in?
  - ☐ Specialized palliative care ward
  - ☐ Palliative care unit
  - ☐ Subordinate Palliativ care beds
- What is the capacity of your facility, measured by the number of beds? \_\_\_\_\_ (beds)

- Which accounting system do you use?

- ☐ Diagnosis related groups  
☐ Daily financial compensation  
☐ Other: \_\_\_\_\_

### **3) Burnout symptoms**

- Have you ever been absent from work due to exhaustion like symptoms?
- Does your institution offer regular preventive measures for the physicians?
- If yes, which ones?

- ☐ yes  
☐ no  
☐ yes  
☐ no  
☐ Supervisions  
☐ Employee appraisals  
☐ Team meetings  
☐ Other: \_\_\_\_\_

- With your present experiences, would you choose the same profession again?
- Comments (optional):

- ☐ Ja  
☐ Nein
- 

**Thank you very much!**
