# Supplementary material
Source: publisher figshare collection journal article supplement (https://karger.figshare.com/articles/dataset/_/24924279)
Supplement: Supplementary file 5 [file 1]

#### Supplement 4: Mean Values of the OLBI

|                      | <b>M</b> | <b>SD</b> | <b>Range</b> |
|----------------------|----------|-----------|--------------|
| <b>Burnout</b>       | 2.00     | ±0.44     | 1.19-3.38    |
| <b>Exhaustion</b>    | 2.30     | ±0.57     | 1.13-3.63    |
| <b>Disengagement</b> | 1.71     | ±0.41     | 1.00-3.25    |

OLBI Oldenburg Burnout Inventory, M Mean value, SD standard deviation
