# Supplementary material
Source: publisher figshare collection journal article supplement (https://karger.figshare.com/articles/dataset/_/24924279)

### Supplement 5: Distribution of exhaustion and disengagement by cut-off

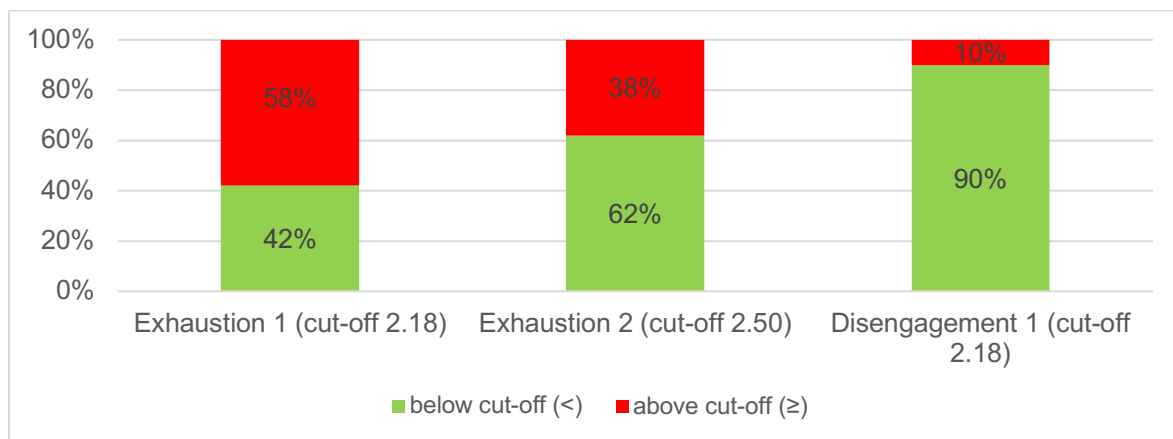

Supplement: Supplementary file 1 [file 1]
